# Supplementary material
Source: publisher figshare collection journal article supplement (https://gsajournals.figshare.com/ndownloader/files/29151990)
Supplement: Supplementary file 1 [file 29151990]

| **Table S1. *S. pombe* strains used in this study** | | |
| --- | --- | --- |
| **Strains** | **Genotype** | **Sources** |
| JS23  (wild-type, WT) | *h+ ura4.294 leu1.32* | Vande Weghe & Ow 1999 |
| *caf5*Δ*obr1*Δ  *SPCC663.08*Δ | *h+ ura4.294 leu1.32* *caf5*::*ura4*+ *obr1*::*kanMX6* *SPCC663.08c*::*hphMX6* | Chen *et al.* 2018 |
| *caf5*Δ | *h+ ura4.294 leu1.32* *caf5*::*ura4*+ | Chen *et al.* 2018 |
| *obr1*Δ | *h+ ura4.294 leu1.32* *obr1*::*kanMX6* | Chen *et al.* 2018 |
| *SPCC663.08*Δ | *h+ ura4.294 leu1.32* *SPCC663.08c*::*hphMX6* | Chen *et al.* 2018 |
| *pap1*Δ | *h+ ura4.294 leu1.32* *pap1*::*kanMX6* | He *et al.* 2017 |
| *HA-pap1+* | *h*+ *ura4.294 leu1.32* *pap1*::*HA-pap1+-kanMX6* | He *et al*. 2017 |
| *HA-hta1* | *h*+ *ura4.294 leu1.32* *hta1*::*HA-hta1-kanMX6* | This study |
| *pht1*Δ | *h+ ura4.294 leu1.32* *pht1*::*kanMX6* | This study |
| *tel1*Δ | *h+ ura4.294 leu1.32* *tel1*::*kanMX6* | This study |
| *rad3*Δ | *h+ ura4.294 leu1.32* *rad3*::*hphMX6* | This study |
| *tel1*Δ*rad3*Δ | *h+ ura4.294 leu1.32* *tel1*::*kanMX6 rad3*::*hphMX6* | This study |
| *hta1*A4*/hta2*A2 | *h+ ura4.294 leu1.32* *hta1*::*hta1*-T121A, S122A, T125A, S129A*-kanMX6 hta2*::*hta2*-S122A, S128A*-ura4*+ | This study |
| *hta1*D4*/hta2*D2 | *h+ ura4.294 leu1.32* *hta1*::*hta1*-T121D, S122D, T125D, S129D*-kanMX6 hta2*::*hta2*-S122D, S128D*-ura4*+ | This study |
| *hta1*A4 | *h+ ura4.294 leu1.32* *hta1*::*hta1* T121A, S122A, T125A, S129A*-kanMX6* | This study |
| *hta1*D4 | *h+ ura4.294 leu1.32* *hta1*::*hta1*-T121D, S122D, T125D, S129D*-kanMX6* | This study |
| *hta2*D2 | *h+ ura4.294 leu1.32* *hta2*::*hta2*-S122D, S128D*-ura4*+ | This study |
| *hta2*A2 | *h+ ura4.294 leu1.32* *hta2*::*hta1*::*hta1*-T121A, S122A*-kanMX6* | This study |
| *hta1*T121A | *h+ ura4.294 leu1.32* *hta1*::*hta1*-T121A*-kanMX6* | This study |
| *hta1*S122A | *h+ ura4.294 leu1.32* *hta1*::*hta1*-S122A*-kanMX6* | This study |
| *hta1*T125A | *h+ ura4.294 leu1.32* *hta1*::*hta1*-T125A*-kanMX6* | This study |
| *hta1*S129A | *h+ ura4.294 leu1.32* *hta1*::*hta1*-S129A*-kanMX6* | This study |
| *hta1*5,9A | *h+ ura4.294 leu1.32* *hta1*::*hta1*-T125A, S129A*-kanMX6* | This study |
| *hta1*1,2,5A | *h+ ura4.294 leu1.32* *hta1*::*hta1*-T121A, S122A, T125A*-kanMX6* | This study |
| *hta1*1,2,9A | *h+ ura4.294 leu1.32* *hta1*::*hta1* T121A, S122A, S129A*-kanMX6* | This study |
| *hta1*1,5,9A | *h+ ura4.294 leu1.32* *hta1*::*hta1*-T121A, T125A, S129A*-kanMX6* | This study |
| *hta1*2,5,9A | *h+ ura4.294 leu1.32* *hta1*::*hta1*-S122A, T125A, S129A*-kanMX6* | This study |
| *rad32*Δ | *h+ ura4.294 leu1.32* *rad32*::*rad32-kanMX6* | This study |
| *mrc1*Δ | *h+ ura4.294 leu1.32* *mrc1*::*mrc1-kanMX6* | This study |
| *cds1*Δ | *h+ ura4.294 leu1.32* *cds1*::*cds1-kanMX6* | This study |
| *crb2*Δ | *h+ ura4.294 leu1.32* *crb2*::*crb2-kanMX6* | This study |
| *chk1*Δ | *h+ ura4.294 leu1.32* *chk1*::*chk1-kanMX6* | This study |
| *swr1*Δ | *h+ ura4.294 leu1.32* *swr1*::*swr1-kanMX6* | This study |

Chen, Y., Y. Zhang, Z. Dong, and D. W. Ow, 2018 Protection from disulfide stress by inhibition of Pap1 nuclear export in *Schizosaccharomyces pombe*. Genetics. 210: 857-868.

He, Y., Y. Chen, W. Song, L. Zhu, Z. Dong, and D. W. Ow, 2017 A Pap1-Oxs1 signaling pathway for disulfide stress in *Schizosaccharomyces pombe*. Nucleic Acids Res. 45: 106-114.

Vande, J. W., and D. W. Ow, 1999 A fission yeast gene for mitochondrial sulfide oxidation. J. Biol. Chem. 274: 13250-13257.

Chen, Y., Y. Zhang, Z. Dong, and D. W. Ow, 2018 Protection from disulfide stress by inhibition of Pap1 nuclear export in *Schizosaccharomyces pombe*. Genetics. 210: 857-868.

He, Y., Y. Chen, W. Song, L. Zhu, Z. Dong, and D. W. Ow, 2017 A Pap1-Oxs1 signaling pathway for disulfide stress in *Schizosaccharomyces pombe*. Nucleic Acids Res. 45: 106-114.

Vande, J. W., and D. W. Ow, 1999 A fission yeast gene for mitochondrial sulfide oxidation. J. Biol. Chem. 274: 13250-13257.
